# Supplementary material for: Left Ventricular Function and Myocardial Triglyceride Content on 3T Cardiac MR Predict Major Cardiovascular Adverse Events and Readmission in Patients Hospitalized with Acute Heart Failure
Source: PubMed Central journal article supplement (PMC7019990; doi:10.3390/jcm9010169), 2020-01-08
Supplement: jcm-09-00169-s001.pdf [file jcm-09-00169-s001.pdf]

**Table S1.** CMR and <sup>1</sup>H-MRS parameters in the study patients with and without MACE (*n* = 133).

| Variable                      | Entire cohort<br>( <i>n</i> = 133) | MACE ( <i>n</i> =<br>39) | No-MACE ( <i>n</i> =<br>94) | <i>p</i> Value |
|-------------------------------|------------------------------------|--------------------------|-----------------------------|----------------|
| CMR parameters                |                                    |                          |                             |                |
| CMR EF (%)                    | 52.2±21.7                          | 40.0±19.5                | 57.2±20.7                   | < 0.001        |
| LV EDV (mL)                   | 151.5±80.0                         | 193.2±92.0               | 134.6±68.0                  | < 0.001        |
| LV EDVI (mL/m <sup>2</sup> )  | 85.8±43.3                          | 109.0±50.2               | 76.4±36.5                   | < 0.001        |
| LV ESV (mL)                   | 84.5±74.7                          | 126.1±86.9               | 67.7±62.2                   | < 0.001        |
| Cardiac output (L/min)        | 4.8±1.8                            | 4.8±2.3                  | 4.8±1.6                     | 0.958          |
| Myocardial mass (g)           | 131.5±59.9                         | 154.7±69.2               | 122.2±53.4                  | 0.012          |
| LV stroke volume (mL)         | 67.0±25.6                          | 67.1±28.0                | 66.9±24.7                   | 0.961          |
| LV mean cavity volume (mL)    | 118.0±76.3                         | 159.6±88.4               | 101.2±64.0                  | 0.001          |
| LV myocardial volume (mL)     | 125.3±57.1                         | 147.3±65.9               | 116.4±50.8                  | 0.012          |
| LV global volume (mL)         | 243.3±121.7                        | 307.0±133.4              | 217.5±107.1                 | 0.001          |
| LVGFI (%)                     | 32.3±14.8                          | 24.9±11.5                | 35.4±14.9                   | < 0.001        |
| <sup>1</sup> H-MRS parameters |                                    |                          |                             |                |
| FA (09,13,16)                 | 202.7±1224.0                       | 128.3±636.7              | 231.1±1385.6                | 0.674          |
| UFA (21,23,28,53)             | 48.0±219.6                         | 52.4±254.0               | 46.2±205.1                  | 0.882          |
| TG (FA+UFA)                   | 241.6±1335.2                       | 167.6±857.0              | 272.3±1492.3                | 0.682          |
| FA/TG                         | 0.6±0.4                            | 0.6±0.4                  | 0.6±0.4                     | 0.293          |
| UFA/TG                        | 0.4±0.4                            | 0.4±0.4                  | 0.4±0.4                     | 0.293          |
| FA/UFA                        | 14.5±31.0                          | 20.5±42.7                | 12.3±25.1                   | 0.281          |

Note.—Categorical data are expressed as numbers (%), whereas continuous variables are given as means ± standard deviations, unless otherwise specified. Abbreviations: EF, *ejection fraction*; LV, *left ventricular*; EDV, *end-diastolic volume*; EDVI, *end-diastolic volume index*; ESV, *end-systolic volume*; FA, *fatty acid*; LVGFI, *left ventricular global volume index*; TG, *triglycerides*; UFA, *unsaturated fatty acids*.
